# Supplementary material
Source: Elsevier journal article supplement (https://www.sciencedirect.com/science/article/pii/S0213485318301579)
Supplement: mmc1 [file S0213485318301579:mmc1.docx]

**Tabla suplementaria 1 Datos demográficos y clínicos recogidos prospectivamente.**

| ***Variable de interés*** | ***Datos recogidos*** |
| --- | --- |
| Edad de inicio de los síntomas | Considerando como síntomas de inicio: disartria o disfagia; disnea u ortopnea; y debilidad, torpeza o atrofia en algún grupo muscular. |
| Sexo | Sexo |
| Hospital de procedencia | Se separó a los pacientes en dos categorías: aquellos estudiados y diagnosticados en el sistema sanitario público (independientemente de que puntualmente realizaran una visita en centros privados) y aquellos en los que el estudio y diagnóstico se realizó en centros privados |
| Fecha de inicio de los síntomas | Se interrogó al paciente sobre la fecha de inicio de los síntomas y posteriormente se corroboró dicha fecha en el primer registro de notas médicas disponible. En caso de discordancia, se escogió la fecha más plausible (por ejemplo, en caso de que la fecha referida por el paciente fuera posterior a la primera visita médica registrada por dichos síntomas, se escogió lo recogido en la visita médica) o se volvió a interrogar al paciente con la información recogida en la visita médica. |
| Forma de inicio | Bulbar o espinal |
| Tasa de progresión | Calculada como: 48-ALSFRS-R al diagnóstico/nº meses desde el inicio de los síntomas27 |
| Categoría de Awaji al diagnóstico | No cumple criterios, Posible, Probable, Definida |

*ALSFRS-R: Escala Funcional para ELA revisada*

**Tabla suplementaria 2 Datos del trayecto diagnóstico, recogidos retrospectivamente.**

| ***Variable de interés*** | ***Datos recogidos*** |
| --- | --- |
| Primera consulta | Fecha y especialidad del primer médico consultado |
| Orientación clínica adecuada | Se consideró adecuada cuando el primer médico derivó al paciente al neurólogo en menos de un mes desde la primera visita. |
| Número de especialistas no neurólogos | Número de especialistas visitados relacionados con los síntomas de ELA. |
| Consultas en Urgencias | Número de visitas a urgencias por síntomas de ELA antes del diagnóstico |
| Consulta en Centro Privado | Visita en un centro privado durante el trayecto diagnóstico por síntomas relacionados con la ELA |
| Consulta en Neurología | Fecha de la primera visita y número de visitas hasta el diagnóstico |
| Diagnóstico erróneo emitido por el neurólogo | Diagnóstico o sospecha diagnóstica del primer neurólogo en visitar al paciente |
| Primer estudio neurofisiológico | Médico que solicita el primer estudio neurofisiológico, fecha de realización y resultado. Se consideraron como no concluyentes aquellos estudios que no cumplían criterios electrofisiológicos de afectación de ninguna región o en los que los estudios de conducción nerviosa no permitían descartar otros trastornos como causa de los síntomas, según los criterios de Awaji28 |
| Último estudio neurofisiológico | En el caso de pacientes con varios estudios neurofisiológicos, se recogió la fecha del último estudio previo al diagnóstico |
| Fecha de diagnóstico | Se interrogó al paciente sobre la fecha en que se le comunicó el diagnóstico y posteriormente se corroboró dicha fecha en las notas médicas disponibles. En caso de discordancia, se consideró la fecha de prescripción de riluzol. |
| Fecha de inicio de riluzol | Fecha de prescripción |
| Pruebas no indicadas/innecesarias | Todas aquellas pruebas realizadas durante el estudio de la enfermedad que no figuran entre las indicadas para el diagnóstico de ELA según las guía europeas2 (pej. radiografía de la mano) o en aquellas realizadas de forma reiterativa, innecesariamente. Esta categorización se realizó por consenso en cada paciente. |

*Nota: la fecha de diagnóstico y de inicio de riluzol se recogieron prospectivamente pero se corroboraron retrospectivamente en las notas médicas disponibles.*
